# Supplementary material
Source: PubMed Central journal article supplement (PMC8785838)
Supplement: 7448_2_supp_88750_qz80l8.pdf [file 7448_2_supp_88750_qz80l8.pdf]

## **ONLINE SUPPLEMENT**

**Title:** Relaxin attenuates organ fibrosis via an angiotensin-type 2 receptor mechanism in aged hypertensive female rats.

*Giannie Barsha<sup>1,2#</sup>, Sarah L Walton<sup>1,2#</sup>, Edmund Kwok<sup>1,2</sup>, Katrina M Mirabito Colafella<sup>1,2</sup>, Anita A Pinar<sup>1,3</sup>, Lucinda M Hilliard Krause<sup>1,2</sup>, Tracey A Gaspari<sup>1,3</sup>, Robert E Widdop<sup>1,3</sup>, Chrishan S Samuel<sup>1,3#</sup>, Kate M Denton<sup>1,2#</sup>*

*<sup>1</sup>Cardiovascular Program, Monash Biomedicine Discovery Institute, <sup>2</sup>Department of Physiology and <sup>3</sup>Department of Pharmacology, Monash University, Melbourne, Victoria, Australia*

*# equal contribution*

**Running title:** RLX-AT<sub>2</sub>R relevance in aged females

### **Corresponding author**

Professor Kate Denton

Department of Physiology

26 Innovation Walk (Building 13F)

Monash University

Victoria, Australia, 3800

Email: [kate.denton@monash.edu](mailto:kate.denton@monash.edu)

Phone: 61 3 9905 9553

## **Table of Contents**

|                                                                                                 |               |
|-------------------------------------------------------------------------------------------------|---------------|
| <i>Table S1. Effect of age and treatment on body and tissue weights recorded on day 28.....</i> | <i>Page 3</i> |
| <i>Figure S1. Glomerular area.....</i>                                                          | <i>Page 4</i> |
| <i>Figure S2. Relative renal gene expression of RXFP1 and angiotensin receptors.....</i>        | <i>Page 5</i> |

**Table S1. Effect of age and treatment on body and tissue weights recorded on day 28.** Post-treatment body weight (BW) and heart and kidney weights in 6-month-old (6MO) and 15-month-old (15MO) female stroke prone-spontaneously hypertensive rats following 4-week treatment of vehicle (Veh; 20 mM sodium acetate s.c.), relaxin (RLX; serelaxin; 0.5 mg/kg/day s.c.) and relaxin+PD123319 (RLX+PD; AT<sub>2</sub>R antagonist; 3 mg/kg/day s.c.).

|             | <b>BW (g)</b> | <b>Total heart weight (g)</b> | <b>Heart:BW (g/100 g BW)</b> | <b>Total kidney weight (g)</b> | <b>Kidney:BW (g/ 100 g BW)</b> |
|-------------|---------------|-------------------------------|------------------------------|--------------------------------|--------------------------------|
| <b>6MO</b>  |               |                               |                              |                                |                                |
| Veh         | 219±5         | 1.14±0.04                     | 0.52±0.01                    | 0.94±0.03                      | 0.43±0.01                      |
| RLX         | 229±4         | 1.24±0.03                     | 0.54±0.01                    | 1.00±0.02                      | 0.44±0.01                      |
| RLX+PD      | 224±3         | 1.24±0.03                     | 0.55±0.01                    | 1.00±0.02                      | 0.44±0.01                      |
| <b>15MO</b> |               |                               |                              |                                |                                |
| Veh         | 259±13****    | 1.75±0.13****                 | 0.69±0.06***                 | 1.32±0.05****                  | 0.52±0.04***                   |
| RLX         | 265±8         | 1.65±0.05                     | 0.63±0.02                    | 1.30±0.02                      | 0.49±0.02                      |
| RLX+PD      | 278±7         | 1.73±0.05                     | 0.62±0.01                    | 1.35±0.05                      | 0.49±0.01                      |

Data are presented as mean ± SEM (n=6-10/group) and analyzed using a two-way ANOVA, followed by Sidak's post-hoc test to correct for multiple comparisons. \*\*\*P<0.001 and \*\*\*\*P<0.0001 as compared to 6MO Veh group.

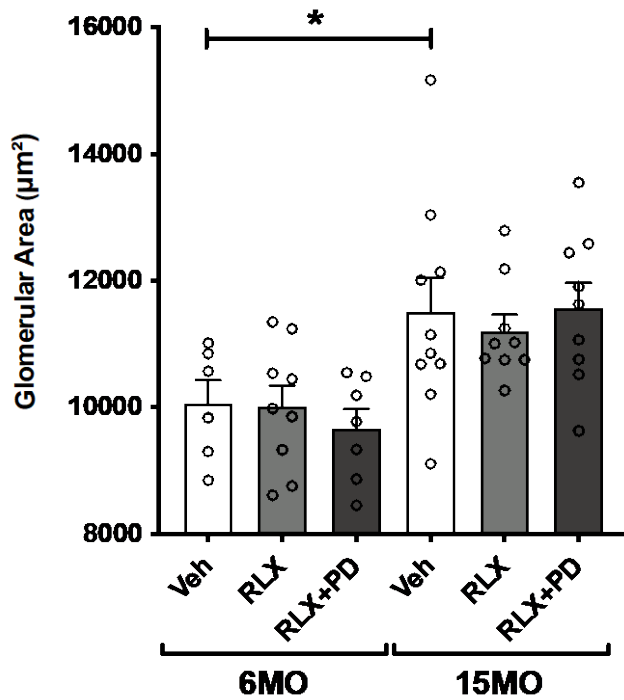

**Figure S1. Glomerular area.** Glomerular area ( $\mu\text{m}^2$ ) in Masson's trichrome-stained kidney sections was measured in 6-month-old (6MO) and 15-month-old (15MO) female stroke prone-spontaneously hypertensive rats ( $n=6-10/\text{group}$ ), after 4 weeks of vehicle (Veh; 20 mM sodium acetate s.c.), RLX (0.5 mg/kg/day s.c.) and RLX+PD123319 ( $\text{AT}_2\text{R}$  antagonist; 3 mg/kg/day s.c.) treatment. Glomerular area was quantified by tracing 30 glomerular borders per animal, when the vascular pole was evident, and measurements averaged. Data are presented as mean  $\pm$  SEM ( $n=6-10/\text{group}$ ) and were analyzed using a Mann-Whitney test. \* $P<0.05$ .

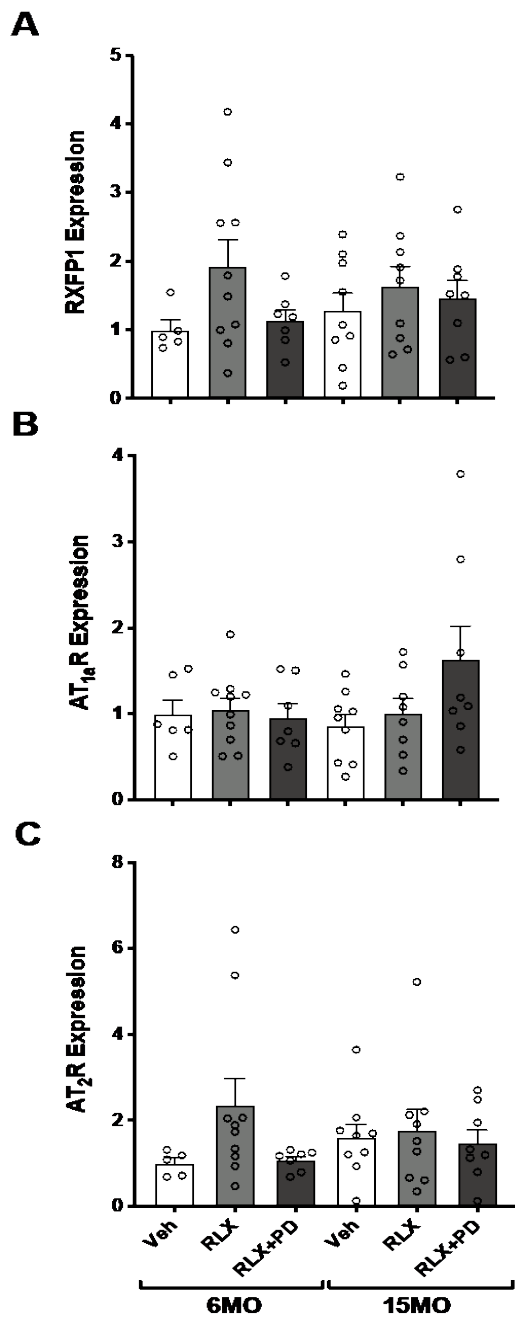

**Figure S2. Relative renal gene expression of RXFP1 and angiotensin receptors.** The relative renal mRNA expression of **(A)** RXFP1 **(B)** AT<sub>1a</sub>R and **(C)** AT<sub>2</sub>R in 6-month-old (6MO) and 15-month-old (15MO) female stroke-prone spontaneously hypertensive rats following 4-week treatment of vehicle (Veh; 20 mM sodium acetate s.c.), relaxin (RLX; serelaxin; 0.5 mg/kg/day s.c.) and relaxin+PD123319 (RLX+PD; AT<sub>2</sub>R antagonist; 3 mg/kg/day s.c.). Data are presented as mean ± SEM and are expressed relative to the 6MO vehicle-treated group (n=5-10/group). 18S rRNA was used as the internal housekeeping gene. Data were analyzed using a two-way ANOVA with factors age, treatment and their interaction, followed by Sidak's multiple comparisons test.
